# Supplementary material
Source: publisher figshare collection journal article supplement (https://karger.figshare.com/ndownloader/files/26599268)
Supplement: Supplementary file 1 [file 26599268]

**Supplemental Table 2.** Summary assessment of risk of bias for animal studies using SYRCLE's “risk of bias” tool

|  | **Selection bias** | | | **Performance bias** | | **Detection bias** | | |  | **Attrition bias** | | --- | --- | | **Reporting bias** | **Overall** |
| --- | --- | --- | --- | --- | --- | --- | --- | --- | --- | --- | --- | --- |
| **Sequence generation** | **Baseline characteristics** | **Allocation concealment** | **Random housing** | **Blinding** | **Random outcome assessment** | **Blinding** | **Incomplete outcome data** | **Selective outcome reporting** |
| Feng et al. (2013)[31]. | Low | Low | Unclear | Unclear | Unclear | Unclear | Unclear | Low | Low | Moderate |
| Goodarzi et al. (2019)[32]. | Low | Low | Unclear | Unclear | Unclear | Unclear | Unclear | Low | Low | Moderate |
| Babaei et al. (2015)[23] | Low | Low | Unclear | Unclear | Unclear | Unclear | Unclear | Low | Low | Moderate |
